# Supplementary material
Source: ML conference proceedings conference paper supplement (https://openaccess.thecvf.com/content/CVPR2024/html/Lei_Instance-aware_Exploration-Verification-Exploitation_for_CVPR_2024_paper.html)
Supplement: Supplementary file 2 [file Lei_Instance-aware_Exploration-Verification-Exploitation_for_CVPR_2024_supplemental.zip]

Archive with 2 entries (2 files):
- 4432_supp/supp.pdf
- 4432_supp/video.mp4
